# Supplementary material for: Fabrication of a Pt nanoparticle surface on an aluminum substrate to achieve excellent superhydrophobicity and catalytic activity
Source: Royal Society of Chemistry journal article supplement (doi:10.1039/c9nj00794f), 2019-01-01
Supplement: c9nj00794f2.pdf [file c9nj00794f2.pdf]

## New Journal of Chemistry

### Fabrication of Pt nanoparticle surface on aluminum substrate for its excellent superhydrophobicity and catalytic activity

Noor Hassan<sup>a</sup>, Shixiang Lu<sup>\*a</sup>, Wenguo Xu<sup>\*a</sup>, He Ge, Muhammad Faheem<sup>a</sup>, Niaz Ahmad<sup>a</sup>, Maroof Ahmad Khan<sup>a</sup>, and Beenish Zia Butt<sup>b</sup>

#### Supplementary Information

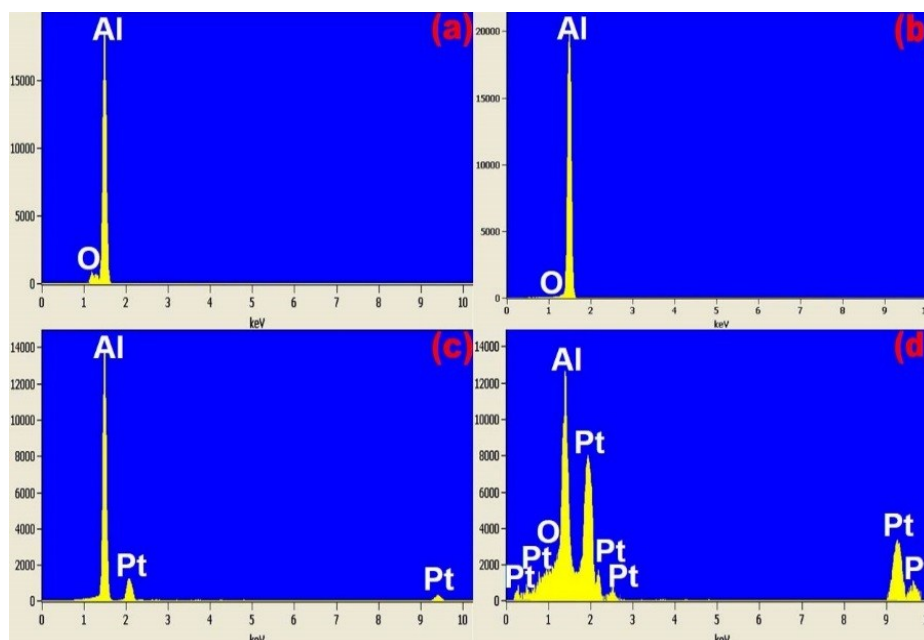

**Fig. S1** EDS spectra of different sheets of Al: (a) pre-treated Al substrate surface; (b) Al sheet after etching step; (c) Al sheet surface after deposition without annealing treatment; (d) SHS

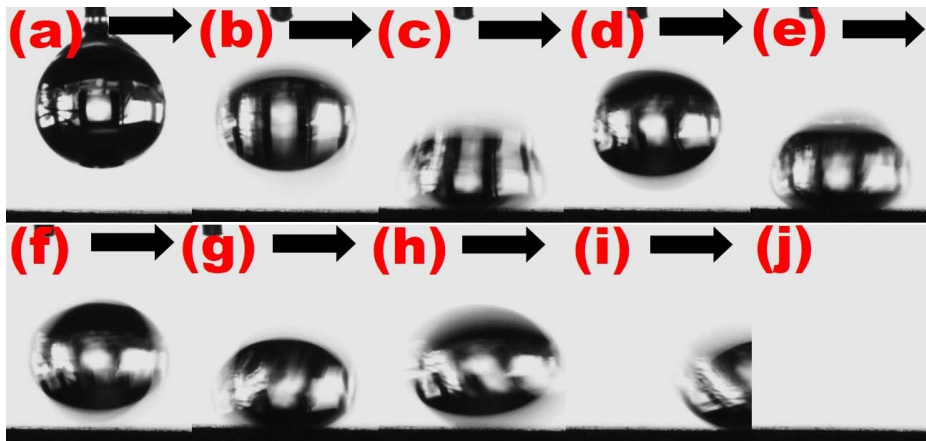

**Fig. S2** Pictures of the water drop falling independently on the SHS, organized the superhydrophobic test for rolling off water drops.

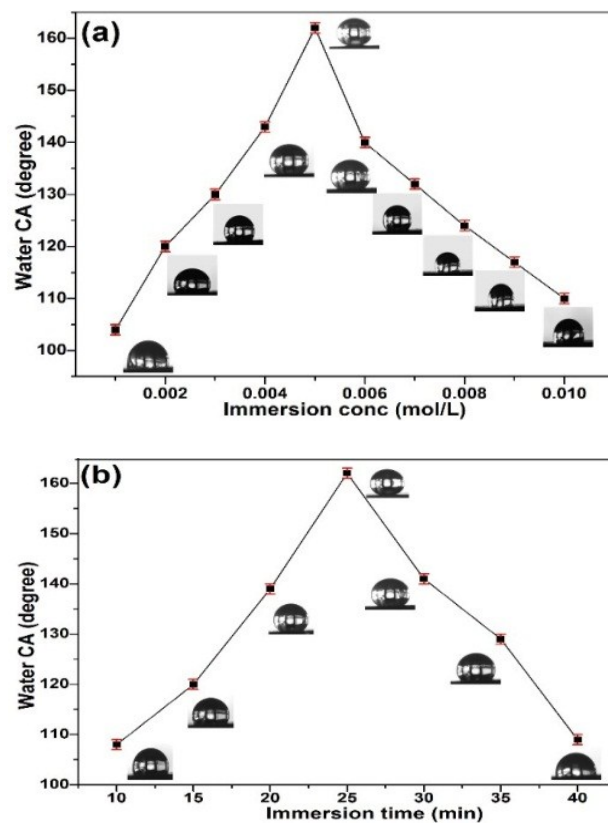

**Fig. S3** Variation in the static WCAs of the sample surface with the immersion concentration (a) and immersion time (b)

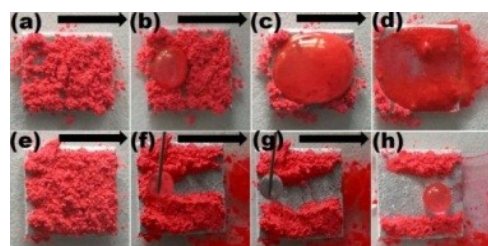

**Fig. S4** Photographs of the pre-treated sample surface from (a) to (d) and SHS from (e) to (h) for the self-cleaning property

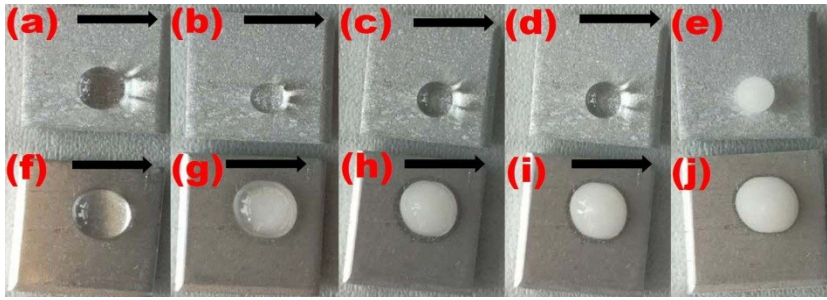

**Fig. S5** Observation of ice formation on samples. The lower sheets denote the pre-treated Al substrate from (f) to (j), and the upper is for the SHS from (a) to (e). Pictures of the beginning of the experiment.

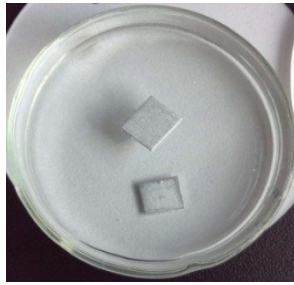

**Fig.S6** Picture of the pre-treated Al sheet and SHS fabricated on Al substrate, superhydrophobic test floating on water.

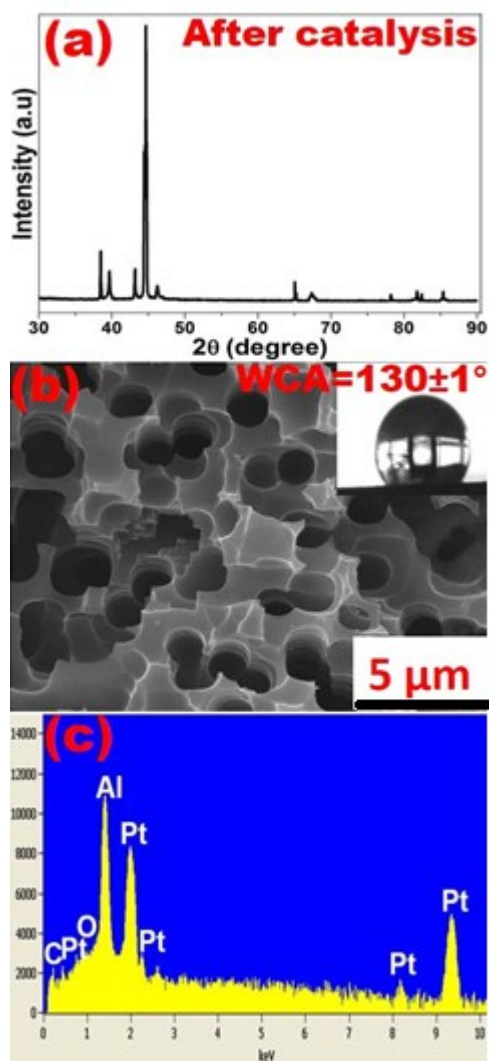

**Fig. S7** XRD pattern (a), SEM picture (b) and EDS spectrum (c) of the SHS after catalysis respectively. The inset is the static WCA of the SHS after catalysis.
